# Supplementary material for: Initial Characterization of the FlgE Hook High Molecular Weight Complex of Borrelia burgdorferi
Source: PLoS One. 2014 May 23;9(5):e98338. doi: 10.1371/journal.pone.0098338 (PMC4032328; doi:10.1371/journal.pone.0098338)
Supplement: Table S2 — FlgE peptides identified in isolated polyhooks. Polyhooks were isolated from the fliK mutant and run on SDS PAGE, excised, trypsin-digested and analyzed by MS as described. Those peptides identified with >95% confidence (conf) are shown, highlighted in green. (XLSX) [file pone.0098338.s003.xlsx]

## Sheet: TaableS2 - polyhook peptides
N	Unused	Total	%Cov	%Cov(50)	%Cov(95)	Accessions	Names	Contrib	Conf	Sequence	Modifications	Cleavages	dMass	Prec MW	Prec m/z	Theor MW	Theor m/z	Theor z
1	26.52	26.52	69	40.95	35.97	gi|15594628	flagellar hook protein FlgE [Borrelia burgdorferi B31]	2	99	AGAFDVDSDR			-0.0399686	1051.42	526.716	1051.46	526.736	2
1	26.52	26.52	69	40.95	35.97	gi|15594628	flagellar hook protein FlgE [Borrelia burgdorferi B31]	2	99	ASDLGVSGNGFFILK	Deamidated(N)@9		-0.0053193	1524.78	763.396	1524.78	763.398	2
1	26.52	26.52	69	40.95	35.97	gi|15594628	flagellar hook protein FlgE [Borrelia burgdorferi B31]	2	99	HLVNPANGMR	Deamidated(N)@7; Oxidation(M)@9		-0.0114139	1124.53	563.271	1124.54	563.277	2
1	26.52	26.52	69	40.95	35.97	gi|15594628	flagellar hook protein FlgE [Borrelia burgdorferi B31]	2	99	IALASFMNPGGLAK			0.00102564	1388.75	695.382	1388.75	695.382	2
1	26.52	26.52	69	40.95	35.97	gi|15594628	flagellar hook protein FlgE [Borrelia burgdorferi B31]	2	99	IGETGLAGLGDIR			-0.0153722	1270.67	636.344	1270.69	636.351	2
1	26.52	26.52	69	40.95	35.97	gi|15594628	flagellar hook protein FlgE [Borrelia burgdorferi B31]	2	99	LGTVGSYTDSITQFADSSSTK			-0.00585887	2164.01	722.344	2164.02	722.346	3
1	26.52	26.52	69	40.95	35.97	gi|15594628	flagellar hook protein FlgE [Borrelia burgdorferi B31]	2	99	LPLIQEGANPADIAR			0.00129622	1576.86	789.437	1576.86	789.436	2
1	26.52	26.52	69	40.95	35.97	gi|15594628	flagellar hook protein FlgE [Borrelia burgdorferi B31]	2	99	MDVVGNNIANVNTIGFK	Oxidation(M)@1		-0.00236808	1820.91	911.461	1820.91	911.462	2
1	26.52	26.52	69	40.95	35.97	gi|15594628	flagellar hook protein FlgE [Borrelia burgdorferi B31]	2	99	RLPLIQEGANPADIAR		missed R-L@1	0.0255907	1732.98	578.669	1732.96	578.66	3
1	26.52	26.52	69	40.95	35.97	gi|15594628	flagellar hook protein FlgE [Borrelia burgdorferi B31]	2	99	SGDTNFVETSNSGQVR			-0.021976	1696.74	849.379	1696.77	849.39	2
1	26.52	26.52	69	40.95	35.97	gi|15594628	flagellar hook protein FlgE [Borrelia burgdorferi B31]	2	99	TITTSDQLLQELVR			-0.0238835	1615.85	808.934	1615.88	808.946	2
1	26.52	26.52	69	40.95	35.97	gi|15594628	flagellar hook protein FlgE [Borrelia burgdorferi B31]	2	99	VGEVGEQQTVNLK		cleaved N-V@N-term	-0.015943	1399.71	700.865	1399.73	700.873	2
1	26.52	26.52	69	40.95	35.97	gi|15594628	flagellar hook protein FlgE [Borrelia burgdorferi B31]	0.02365	99	GLAGLGDIR	Carbamidomethyl@N-term	cleaved T-G@N-term	0.00407945	927.518	464.766	927.514	464.764	2
